# Supplementary material for: Exceptional Diversity, Non-Random Distribution, and Rapid Evolution of Retroelements in the B73 Maize Genome
Source: PLoS Genet. 2009 Nov 20;5(11):e1000732. doi: 10.1371/journal.pgen.1000732 (PMC2774510; doi:10.1371/journal.pgen.1000732)
Supplement: Table S2 — Gene capture events uncovered in the full-length LTR-retrotransposons. (0.03 MB XLS) [file pgen.1000732.s007.xls]

## Sheet: Sheet1
SF	Family1	Fragment(s) aquired	Copy number in B73	bp
RLC	bote	FAD-binding family	1	138
RLC	debeh	HAT dimerisation family	1	166
RLC	ebel	Rice gene family candidate, 0006430	1	117
RLC	ebel	Rice gene family candidate, 0011514	1	106
RLC	ebel	Rice gene family candidate, 0012045	2	166
RLC	ebel	WD40 repeat family	2	564
RLC	erev	Peptidase aspartic, catalytic family	2	406
RLC	fourf	Peptidase S10, serine carboxypeptidase family	17	1853
RLC	gudyeg	Peptidase S10, serine carboxypeptidase family	7	742
RLC	homy	ABC transporter related family	12	3565
RLC	iseb	Typical LEA gene family	2	275
RLC	ji	AAA ATPase, core family	2	220
RLC	ji	Chaperonin Cpn60/TCP-1 family	1	75
RLC	ji	Coatomer, epsilon subunit family	1	162
RLC	ji	Cystathionine beta-synthase, core family	2	172
RLC	ji	Heat shock protein 70 family	2	350
RLC	ji	Inorganic H+ pyrophosphatase family	2	442
RLC	ji	Pentatricopeptide repeat family	2	204
RLC	ji	Plant peroxidase family	1	80
RLC	ji	Protein kinase, core family	2	203
RLC	ji	Rice gene family candidate, 0010468	1	68
RLC	ji	Zinc finger, TTF-type family	1	1458
RLC	opie	Peptidase S14, ClpP family	2	246
RLC	opie	Regulator of chromosome condensation/beta-lactamase-inhibitor protein II family	1	211
RLC	sofi	Rice gene family candidate, 0006675	2	148
RLC	ubel	Ribulose-phosphate binding barrel family	4	812
RLG	anysaf	Rice gene family candidate, 0008142	1	53
RLG	bogu	Peptidase aspartic, catalytic family	5	1233
RLG	bosohe	Peptidase aspartic, catalytic family	20	6340
RLG	bygum	Homeobox family	1	98
RLG	cinful-zeon	AAA ATPase, core family	1	153
RLG	cinful-zeon	Caffeic acid O-methyltransferase family	24	1668
RLG	cinful-zeon	DNA polymerase III, subunits gamma and tau family	1	108
RLG	cinful-zeon	Glyceraldehyde 3-phosphate dehydrogenase family	2	168
RLG	cinful-zeon	Ribosomal protein S4E family	1	55
RLG	cinful-zeon	Rice gene family candidate, 0008745	1	158
RLG	cinful-zeon	Rice gene family candidate, 0011056	1	68
RLG	ewib	Helicase, C-terminal family	5	461
RLG	ewiut	Peptidase aspartic, catalytic family	1	93
RLG	flip	Putative von Willebrand factor, type A family	2	106
RLG	flip	Short organization (SHO) gene family	1	142
RLG	gofi	Chromo family	2	232
RLG	huck	Armadillo-like helical family	1	71
RLG	huck	Caffeic acid O-methyltransferase family	14	841
RLG	huck	Peptidase aspartic, catalytic family	1	1147
RLG	huck	Rice gene family candidate, 0011056	1	74
RLG	iwim	Peptidase aspartic, catalytic family	2	140
RLG	jaws	Peptidase aspartic, catalytic family	2	132
RLG	laiwa	Peptidase aspartic, catalytic family	9	8780
RLG	maro	Chromo family	3	199
RLG	mufeub	Peptidase aspartic, catalytic family	1	113
RLG	mywur	Peptidase aspartic, catalytic family	1	74
RLG	oguod	Chromo family	1	62
RLG	ojokat	Chromo family	2	156
RLG	prem1	AAA ATPase, core family	1	61
RLG	prem1	Protein phosphatase 2C-related family	1	93
RLG	prem1	Rice gene family candidate, 0006743	1	107
RLG	prem1	Rice gene family candidate, 0011056	7	476
RLG	prem1	Rice gene family candidate, 0011109	5	411
RLG	puck	Homeobox family	12	2523
RLG	puck	Putative Eggshell protein family	4	207
RLG	puck	Rice gene family candidate, 0007576	1	258
RLG	sowu	Chromo family	1	65
RLG	suda	Peptidase aspartic, catalytic family	1	69
RLG	ubid	Chromo family	2	150
RLG	udav	Peptidase aspartic, catalytic family	2	124
RLG	ugano	Chromo family	2	118
RLG	uwew	Peptidase aspartic, catalytic family	1	92
RLG	vufi	Chromo family	1	70
RLG	weaniv	Peptidase aspartic, catalytic family	3	267
RLG	wuwe	Chromo family	2	118
RLG	ytub	Chromo family	1	94
RLX	bawigu	Rice gene family candidate, 0011592	2	1102
RLX	beby	C2 calcium-dependent membrane targeting family	1	104
RLX	bs1	Aldehyde dehydrogenase family	4	1170
RLX	bs1	Mitochodrial transcription termination factor-related family	5	405
RLX	bs1	Pentatricopeptide repeat family	2	1002
RLX	bs1	Transcription factor jumonji/aspartyl beta-hydroxylase family	1	92
RLX	defub	Peptidase M16, C-terminal family	1	127
RLX	gotur	Cytochrome b5 family	1	169
RLX	gufa	Heat shock protein 70 family	2	296
RLX	ifab	Ribose 5-phosphate isomerase family	3	235
RLX	jeli	Pentatricopeptide repeat family	1	402
RLX	jeli	Protein of unknown function DUF248, methyltransferase putative family	5	2430
RLX	jeli	Rice gene family candidate, 0010431	5	800
RLX	jeli	Rice gene family candidate, 0011246	1	115
RLX	jupek	Peptidase S9A, prolyl oligopeptidase family	3	712
RLX	kinosi	Protein prenyltransferase family	1	145
RLX	lamyab	Peptidase aspartic, catalytic family	13	9474
RLX	mafigi	Raffinose synthase family	2	202
RLX	mako	Heat shock protein Hsp90 family	2	480
RLX	mibaab	AAA ATPase, core family	1	952
RLX	mibaab	Copper amine oxidase family	1	57
RLX	mibaab	Pathogenesis-related transcriptional factor and ERF family	2	362
RLX	mibaab	Rice gene family candidate, 0007820	1	53
RLX	mibaab	Thiolase family	4	460
RLX	mopin	Glucose/ribitol dehydrogenase family	3	261
RLX	mulaf	Xanthine/uracil/vitamin C permease family	1	394
RLX	name	Snf7 family	1	94
RLX	neafu	Enoyl-CoA hydratase/isomerase family	2	519
RLX	neafu	Malic oxidoreductase family	3	411
RLX	nyjuvy	Rice gene family candidate, 0009691	1	95
RLX	oweiw	AAA ATPase, core family	6	780
RLX	oweiw	Elongation factor G, III and V family	1	119
RLX	petopi	Galactokinase family	2	428
RLX	raga	Rice gene family candidate, 0007733	2	236
RLX	ruwi	Cytochrome P450 family	1	103
RLX	ruwi	Rice gene family candidate, 0011119	1	65
RLX	saahol	Protein prenyltransferase family	1	145
RLX	toro	Tubulin family	3	186
RLX	tuteh	Plant peroxidase family	1	72
RLX	tuteh	Rice gene family candidate, 0006969	1	177
RLX	tuteh	Zinc finger, RING-type family	1	104
RLX	vafim	Cinnamyl alcoholdehydrogenase family	1	181
RLX	vedi	Histone H3 family	2	390
RLX	vedi	Lecithin:cholesterol acyltransferase family	2	572
RLX	wiolus	Armadillo-like helical family	3	725
RLX	wiru	Rice gene family candidate, 0011592	1	324
RLX	yemi	Transcription factor jumonji/aspartyl beta-hydroxylase family	1	668
RLX	unk	Aminotransferase, class I and II family	1	87
RLX	unk	ATP-dependent DNA helicase RecQ family	1	110
RLX	unk	Caffeic acid O-methyltransferase family	4	255
RLX	unk	Chaperonin clpA/B family	1	182
RLX	unk	Chaperonin Cpn10 family	1	163
RLX	unk	Chromo family	2	118
RLX	unk	Cinnamyl alcoholdehydrogenase family	1	181
RLX	unk	Copper amine oxidase family	1	57
RLX	unk	Cystathionine beta-synthase, core family	1	82
RLX	unk	Cytochrome P450 family	1	248
RLX	unk	Enoyl-CoA hydratase/isomerase family	1	266
RLX	unk	Exoribonuclease, phosphorolytic domain 1 family	1	186
RLX	unk	F-box family	1	272
RLX	unk	Glyoxalase/extradiol ring-cleavage dioxygenase family	1	132
RLX	unk	Heat shock protein 70 family	3	248
RLX	unk	Homeobox family	4	619
RLX	unk	HSP20-like chaperone family	1	100
RLX	unk	Laccase family	1	232
RLX	unk	Mandelate racemase/muconate lactonizing enzyme family	1	67
RLX	unk	Mitochodrial transcription termination factor-related family	1	81
RLX	unk	NPH3 family	2	120
RLX	unk	Nucleotide-binding, alpha-beta plait family	1	137
RLX	unk	Pectate lyase family	1	208
RLX	unk	Pentatricopeptide repeat family	1	178
RLX	unk	Peptidase aspartic, catalytic family	19	9271
RLX	unk	Peptidase S10, serine carboxypeptidase family	4	384
RLX	unk	Peptidase S14, ClpP family	1	136
RLX	unk	Peptidase S9A, prolyl oligopeptidase family	1	246
RLX	unk	Pheophorbide a oxygenase family	1	410
RLX	unk	Phytochrome A/B/C/D/E family	1	308
RLX	unk	Prephenate dehydratase family	1	208
RLX	unk	Protein of unknown function DUF266, plant family	2	258
RLX	unk	Protein of unknown function DUF569 family	1	117
RLX	unk	Protein of unknown function DUF6, transmembrane family	1	132
RLX	unk	Protein of unknown function DUF914, eukaryotic family	2	938
RLX	unk	Protein phosphatase 2C-related family	4	363
RLX	unk	Protein-L-isoaspartate(D-aspartate) O-methyltransferase family	1	130
RLX	unk	Putative Clp, N-terminal family	1	124
RLX	unk	Putative Glycine rich family	1	223
RLX	unk	Ribosomal protein L14b/L23e family	1	55
RLX	unk	Ribosomal protein L4/L1e, archeabacterial like family	2	108
RLX	unk	Ribosomal protein S4E family	3	577
RLX	unk	Rice gene family candidate, 0006076	1	150
RLX	unk	Rice gene family candidate, 0008584	1	354
RLX	unk	Rice gene family candidate, 0009691	1	95
RLX	unk	Rice gene family candidate, 0010797	1	108
RLX	unk	Rice gene family candidate, 0011119	1	65
RLX	unk	RNA polymerase Rpb2, domain 7 family	1	201
RLX	unk	SANT, DNA-binding family	1	66
RLX	unk	Thiamine pyrophosphate enzyme, N-terminal TPP binding region family	2	362
Table S2. Gene capture events uncovered in the full-length LTR-retrotransposons
mined from the B73 genome.
1unk = unknown family designation
